# Supplementary material for: TarSynFlow, a workflow for bacterial genome comparisons that revealed genes putatively involved in the probiotic character of Shewanella putrefaciens strain Pdp11
Source: PeerJ journal article supplement (doi:10.7717/peerj.6526), 2019-02-28
Supplement: Supplemental_File_S2.pdf [file Supplemental_File_S2.pdf]

## Supplemental File S2

Table showing the 64 NPS-specific proteins that are absent in the probiotic Pdp11. The result is taken just as saved by TarSynFlow.

| UniProt ID | Protein length | Status     | Protein description                                                       | Gene ontology (GO) terms                                                                                                                                                                                                                                   |
|------------|----------------|------------|---------------------------------------------------------------------------|------------------------------------------------------------------------------------------------------------------------------------------------------------------------------------------------------------------------------------------------------------|
| A4YAU3     | 709            | unreviewed | Dissimilatory sulfite reductase (EC 1.8.99.-)                             | periplasmic space [GO:0042597]; copper ion binding [GO:0005507]; heme binding [GO:0020037]; iron ion binding [GO:0005506]; sulfite reductase activity [GO:0016002]; anaerobic respiration [GO:0009061]; hydrogen sulfide biosynthetic process [GO:0070814] |
| A4YA11     | 672            | unreviewed | Potassium-transporting ATPase ATP-binding subunit                         | integral component of plasma membrane [GO:0005887]; ATP binding [GO:0005524]; magnesium ion binding [GO:0000287]; potassium-transporting ATPase activity [GO:0008556]                                                                                      |
| A4YA12     | 574            | unreviewed | Potassium-transporting ATPase potassium-binding subunit                   | integral component of plasma membrane [GO:0005887]; potassium ion binding [GO:0030955]; potassium-transporting ATPase activity [GO:0008556]                                                                                                                |
| A4YA10     | 199            | reviewed   | Potassium-transporting ATPase KdpC subunit                                | integral component of plasma membrane [GO:0005887]; ATP binding [GO:0005524]; potassium-transporting ATPase activity [GO:0008556]                                                                                                                          |
| A4YCJ4     | 364            | unreviewed | Integral membrane sensor signal transduction histidine kinase             | integral component of membrane [GO:0016021]; intracellular [GO:0005622]; ATP binding [GO:0005524]; phosphorelay sensor kinase activity [GO:0000155]                                                                                                        |
| A4YAC0     | 720            | unreviewed | TonB-dependent receptor                                                   | cell outer membrane [GO:0009279]; receptor activity [GO:0004872]; transport [GO:0006810]                                                                                                                                                                   |
| A4YBL1     | 804            | unreviewed | TonB-dependent receptor                                                   | cell outer membrane [GO:0009279]; receptor activity [GO:0004872]; transport [GO:0006810]                                                                                                                                                                   |
| A4YA08     | 886            | unreviewed | Osmosensitive K <sup>+</sup> channel signal transduction histidine kinase | integral component of membrane [GO:0016021]; intracellular [GO:0005622]; ATP binding [GO:0005524]; phosphorelay sensor kinase activity [GO:0000155]                                                                                                        |

|        |      |            |                                                              |                                                                                                                                                                                                                  |
|--------|------|------------|--------------------------------------------------------------|------------------------------------------------------------------------------------------------------------------------------------------------------------------------------------------------------------------|
| A4YAU6 | 194  | unreviewed | Redoxin domain protein                                       | cell [GO:0005623]; antioxidant activity [GO:0016209]; oxidoreductase activity [GO:0016491]; cell redox homeostasis [GO:0045454]                                                                                  |
| A4YC21 | 413  | unreviewed | ATP-binding region, ATPase domain protein domain protein     | integral component of membrane [GO:0016021]; intracellular [GO:0005622]; ATP binding [GO:0005524]; phosphorelay sensor kinase activity [GO:0000155]                                                              |
| A4YCJ3 | 242  | unreviewed | Two component transcriptional regulator, winged helix family | intracellular [GO:0005622]; DNA binding [GO:0003677]; phosphorelay signal transduction system [GO:0000160]; regulation of transcription, DNA-templated [GO:0006355]; transcription, DNA-templated [GO:0006351]   |
| A4YC22 | 225  | unreviewed | Two component transcriptional regulator, winged helix family | intracellular [GO:0005622]; DNA binding [GO:0003677]; phosphorelay signal transduction system [GO:0000160]; regulation of transcription, DNA-templated [GO:0006355]; transcription, DNA-templated [GO:0006351]   |
| A4Y253 | 207  | unreviewed | Two component transcriptional regulator, LuxR family         | intracellular [GO:0005622]; DNA binding [GO:0003677]; phosphorelay signal transduction system [GO:0000160]; regulation of transcription, DNA-templated [GO:0006355]; transcription, DNA-templated [GO:0006351]   |
| A4YAT5 | 427  | unreviewed | Transcriptional regulator, CadC                              | integral component of membrane [GO:0016021]; intracellular [GO:0005622]; DNA binding [GO:0003677]; phosphorelay signal transduction system [GO:0000160]; regulation of transcription, DNA-templated [GO:0006355] |
| E6XRR4 | 506  | unreviewed | Flavocytochrome c, flavin subunit (EC 1.3.99.1)              | succinate dehydrogenase activity [GO:0000104]                                                                                                                                                                    |
| A4Y1H4 | 607  | unreviewed | Glycerophosphoryl diester phosphodiesterase                  | integral component of membrane [GO:0016021]; glycerophosphodiester phosphodiesterase activity [GO:0008889]; lipid metabolic process [GO:0006629]                                                                 |
| A4Y5E5 | 1185 | unreviewed | Uncharacterized protein                                      | integral component of membrane [GO:0016021]; metallopeptidase activity [GO:0008237]; zinc ion binding [GO:0008270]; transport [GO:0006810]                                                                       |

|        |     |            |                                                       |                                                                                                                                                                                                                           |
|--------|-----|------------|-------------------------------------------------------|---------------------------------------------------------------------------------------------------------------------------------------------------------------------------------------------------------------------------|
| E6XN68 | 263 | unreviewed | Transcriptional regulator, Crp/Fnr family             | DNA binding [GO:0003677]; regulation of transcription, DNA-templated [GO:0006355]; transcription, DNA-templated [GO:0006351]                                                                                              |
| A4Y9T3 | 487 | unreviewed | Transcriptional regulator, GntR family                | catalytic activity [GO:0003824]; DNA binding [GO:0003677]; pyridoxal phosphate binding [GO:0030170]; transcription factor activity, sequence-specific DNA binding [GO:0003700]; transcription, DNA-templated [GO:0006351] |
| A4YC19 | 582 | unreviewed | Flavocytochrome c                                     | membrane [GO:0016020]; FMN binding [GO:0010181]; succinate dehydrogenase activity [GO:0000104]                                                                                                                            |
| A4YAW2 | 239 | unreviewed | Transcriptional regulator, GntR family                | DNA binding [GO:0003677]; transcription factor activity, sequence-specific DNA binding [GO:0003700]; transcription, DNA-templated [GO:0006351]                                                                            |
| A4Y869 | 545 | unreviewed | Phenylalanine/histidine ammonia-lyase                 | lyase activity [GO:0016829]                                                                                                                                                                                               |
| E6XRR3 | 264 | unreviewed | Regulatory protein TetR                               | DNA binding [GO:0003677]; regulation of transcription, DNA-templated [GO:0006355]; transcription, DNA-templated [GO:0006351]                                                                                              |
| A4Y3C5 | 334 | unreviewed | 2OG-Fe(II) oxygenase                                  | iron ion binding [GO:0005506]; oxidoreductase activity [GO:0016491]                                                                                                                                                       |
| A4YBR2 | 203 | unreviewed | Transcriptional regulator, TetR family                | DNA binding [GO:0003677]; regulation of transcription, DNA-templated [GO:0006355]; transcription, DNA-templated [GO:0006351]                                                                                              |
| A4Y4N4 | 707 | unreviewed | Aldehyde ferredoxin oxidoreductase (EC 1.2.7.5)       | aldehyde ferredoxin oxidoreductase activity [GO:0033726]; electron carrier activity [GO:0009055]; iron-sulfur cluster binding [GO:0051536]                                                                                |
| A4Y4N9 | 296 | unreviewed | Uncharacterized protein                               |                                                                                                                                                                                                                           |
| A4YAT9 | 163 | unreviewed | NosL family protein                                   |                                                                                                                                                                                                                           |
| A4Y4N3 | 214 | unreviewed | 4Fe-4S ferredoxin, iron-sulfur binding domain protein |                                                                                                                                                                                                                           |
| A4YAU2 | 146 | unreviewed | Rhodanese domain protein                              |                                                                                                                                                                                                                           |

|        |     |            |                                                   |                                                                                                                                                |
|--------|-----|------------|---------------------------------------------------|------------------------------------------------------------------------------------------------------------------------------------------------|
| A4YBE8 | 183 | unreviewed | Uncharacterized protein                           |                                                                                                                                                |
| A4Y3R6 | 161 | unreviewed | Uncharacterized protein                           |                                                                                                                                                |
| A4Y8G6 | 184 | unreviewed | Sugar transferase                                 | integral component of membrane [GO:0016021]; transferase activity [GO:0016740]                                                                 |
| A4YC20 | 254 | unreviewed | Uncharacterized protein                           | cell outer membrane [GO:0009279]                                                                                                               |
| A4YAW6 | 116 | unreviewed | Uncharacterized protein                           |                                                                                                                                                |
| A4Y4V6 | 156 | unreviewed | Uncharacterized protein                           |                                                                                                                                                |
| A4Y600 | 384 | unreviewed | Major facilitator superfamily MFS_1               | integral component of membrane [GO:0016021]; transmembrane transport [GO:0055085]                                                              |
| A4Y3K8 | 342 | unreviewed | Outer membrane porin, putative                    |                                                                                                                                                |
| A4Y3S5 | 273 | unreviewed | Cytochrome c, putative                            |                                                                                                                                                |
| A4YAD3 | 176 | unreviewed | Uncharacterized protein                           |                                                                                                                                                |
| A4YBR1 | 239 | unreviewed | ThiJ/PfpI domain protein                          |                                                                                                                                                |
| A4Y847 | 143 | unreviewed | Uncharacterized protein                           |                                                                                                                                                |
| A4YAU0 | 226 | unreviewed | Formate-dependent nitrite reductase, NrfG protein | integral component of membrane [GO:0016021]                                                                                                    |
| A4Y5E4 | 292 | unreviewed | ABC transporter related                           | ATP binding [GO:0005524]; ATPase activity [GO:0016887]                                                                                         |
| A4Y5F4 | 171 | unreviewed | Uncharacterized protein                           |                                                                                                                                                |
| A4Y601 | 226 | unreviewed | Cyclic nucleotide-binding protein                 |                                                                                                                                                |
| A4YAB5 | 201 | unreviewed | Uncharacterized protein                           |                                                                                                                                                |
| A4Y6D0 | 103 | unreviewed | Transport-associated                              |                                                                                                                                                |
| A4YA09 | 256 | unreviewed | Uncharacterized protein                           |                                                                                                                                                |
| A4YBE9 | 150 | unreviewed | Uncharacterized protein                           |                                                                                                                                                |
| A4Y3K9 | 298 | unreviewed | Transcriptional regulator, LysR family            | DNA binding [GO:0003677]; transcription factor activity, sequence-specific DNA binding [GO:0003700]; transcription, DNA-templated [GO:0006351] |

|        |     |            |                                                                        |                                                                                     |
|--------|-----|------------|------------------------------------------------------------------------|-------------------------------------------------------------------------------------|
| A4YCB6 | 352 | unreviewed | CDP-glycerol:poly(Glycerophosphate) glycerophosphotransferase          | membrane [GO:0016020]; CDP-glycerol glycerophosphotransferase activity [GO:0047355] |
| A4Y6G5 | 96  | unreviewed | Cytochrome c3                                                          |                                                                                     |
| A4YAW5 | 557 | unreviewed | Fumarate reductase/succinate dehydrogenase flavoprotein domain protein | oxidoreductase activity [GO:0016491]                                                |
| A4Y3V6 | 365 | unreviewed | Sodium/calcium exchanger membrane region                               | integral component of membrane [GO:0016021]; transmembrane transport [GO:0055085]   |
| A4Y5W9 | 130 | unreviewed | Uncharacterized protein                                                |                                                                                     |
| A4YAT8 | 431 | unreviewed | Periplasmic copper-binding                                             |                                                                                     |
| A4YAU5 | 139 | unreviewed | Cytochrome C biogenesis protein                                        | integral component of membrane [GO:0016021]                                         |
| E6XRR5 | 123 | unreviewed | Flavocytochrome c, heme submit                                         |                                                                                     |
| E6XFL2 | 22  | unreviewed | LeuABCD operon attenuation leader peptide, LeuL                        |                                                                                     |
| E6XRR8 | 246 | unreviewed | Putative uncharacterized protein                                       |                                                                                     |
| E6XLJ3 | 146 | unreviewed | Putative uncharacterized protein                                       |                                                                                     |
| E6XJB6 | 156 | unreviewed | Putative uncharacterized protein                                       |                                                                                     |
| E6XRR6 | 377 | unreviewed | Outer membrane beta barrel protein                                     |                                                                                     |
