# Supplementary material for: TarSynFlow, a workflow for bacterial genome comparisons that revealed genes putatively involved in the probiotic character of Shewanella putrefaciens strain Pdp11
Source: PeerJ journal article supplement (doi:10.7717/peerj.6526), 2019-02-28

### Supplemental File S3

Similarity between sequence amplicons and Pdp11 genome sequence. The table contains the tabulated blast output when amplicon sequences were queried using the Pdp11 genome as subject database. Then, QV plots for the two amplicon sequences whose identity was lower than 96% (A4Y1U2 and E6XLE5) was shown to demonstrate that sequence divergence is explained by low QV values rather than real sequence divergences. The QV plot for Q8GJK1 is also included as reference of amplicon sequence with 'good' quality.

| Amplicon sequence file as query       | Subject ID | % identity | Align. length | Mismatch count | Gap open count | Query start | Query end | Subject start | Subject end | e-Value | Score |
|---------------------------------------|------------|------------|---------------|----------------|----------------|-------------|-----------|---------------|-------------|---------|-------|
| 170201-063_C17_G14_Pdp11_E6XG14_R.ab1 | Sp_Pdp11   | 96.73      | 1222          | 21             | 18             | 6           | 1209      | 3863413       | 3864633     | 0.0     | 2017  |
| 170125-078_E11_G15_Pdp11_E6XG15_F.ab1 | Sp_Pdp11   | 98.25      | 571           | 9              | 1              | 13          | 582       | 3865845       | 3865275     | 0.0     | 998   |
| 170125-078_E13_LE5_Pdp11_E6XLE5_F.ab1 | Sp_Pdp11   | 88.25      | 366           | 39             | 4              | 136         | 501       | 3454748       | 3455109     | 3e-122  | 435   |
| 170201-063_A03_k1_Pdp11_Q8GJK1_R.ab1  | Sp_Pdp11   | 99.30      | 859           | 2              | 4              | 10          | 866       | 4298959       | 4298103     | 0.0     | 1550  |
| 170201-063_G03_R2_Pdp11_Q6ZYR2_F.ab1  | Sp_Pdp11   | 99.71      | 1023          | 2              | 1              | 20          | 1041      | 4390569       | 4391591     | 0.0     | 1871  |
| 170201-063_C01_U2_Pdp11_A4Y1U2_F.ab1  | Sp_Pdp11   | 78.41      | 602           | 117            | 13             | 12          | 610       | 3192525       | 3191934     | 3e-105  | 379   |

## QV plot for A4Y1U2

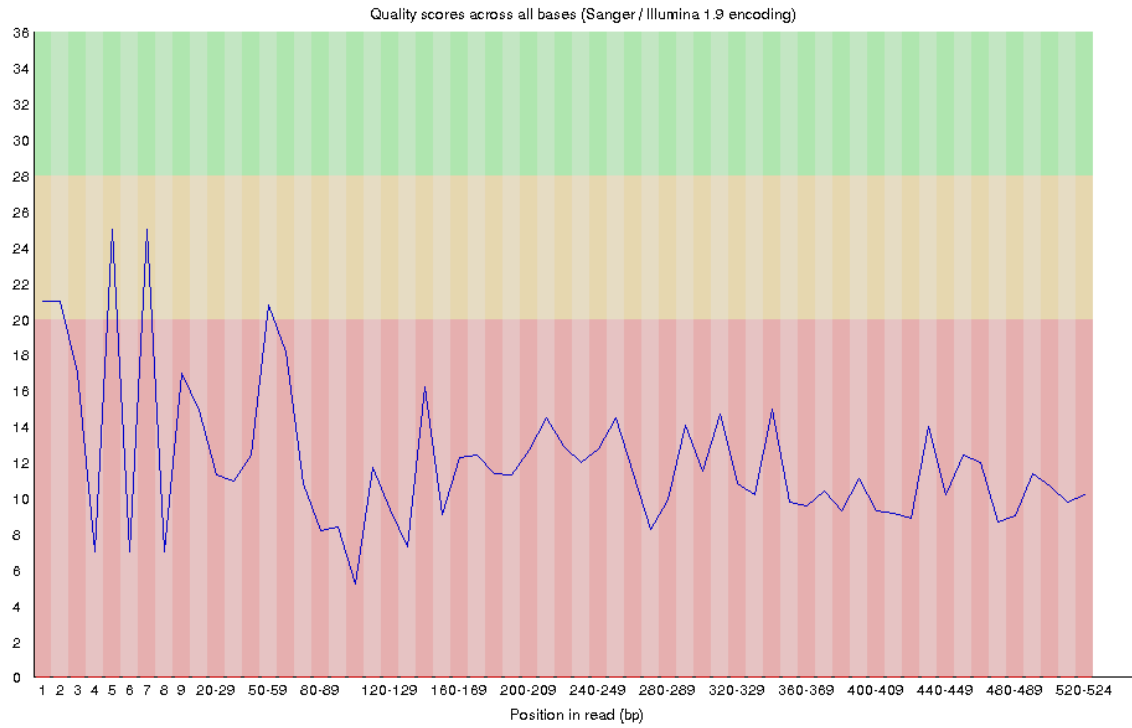

## QV plot for E6XLE5

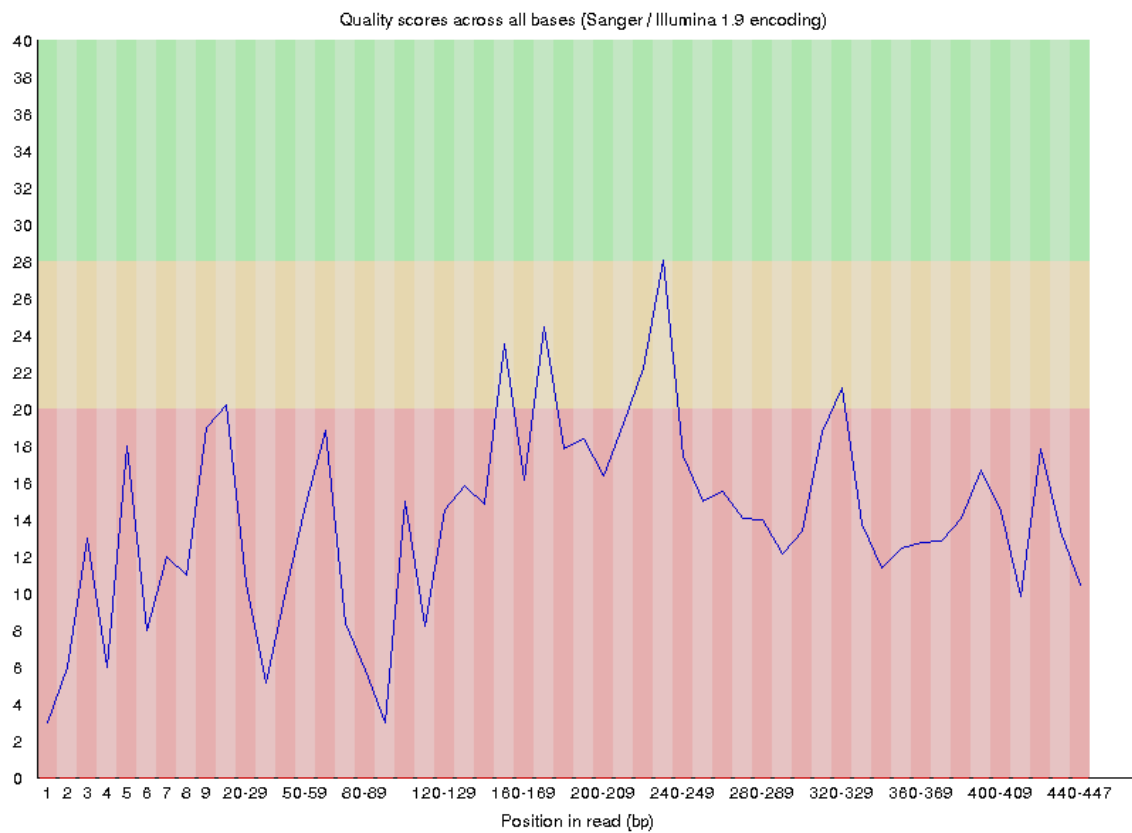

# QV plot for Q8GJK1

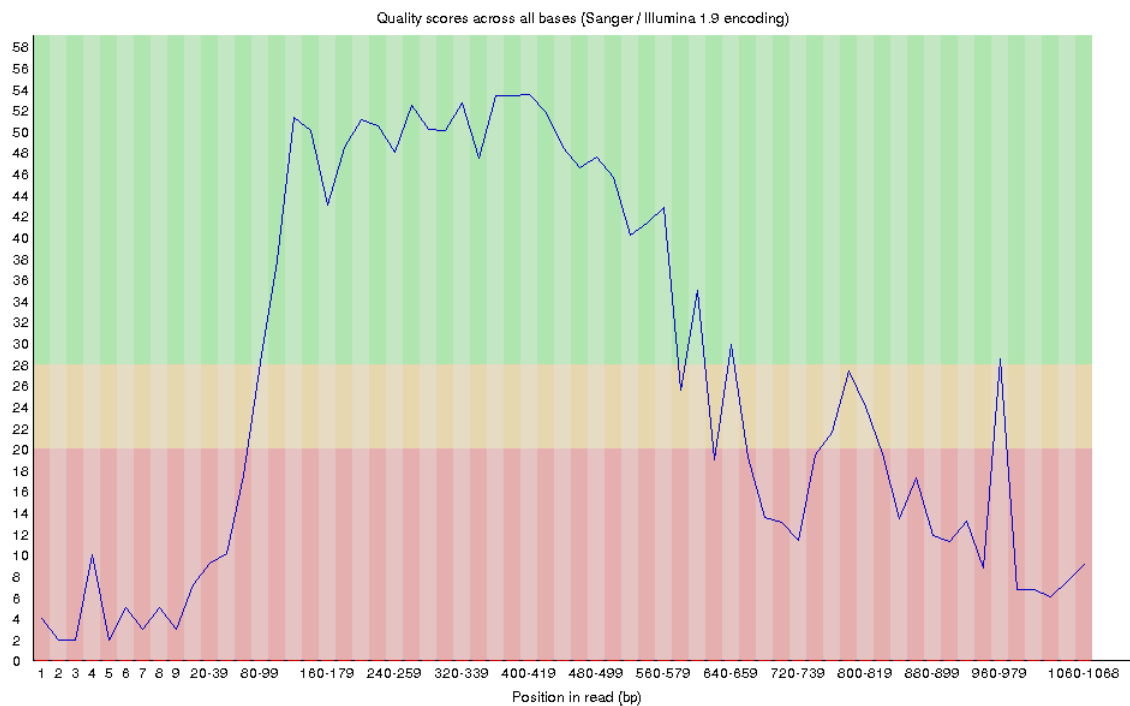

Supplement: Supplemental_File_S3.pdf [file Supplemental_File_S3.pdf]
